## RESEARCH ARTICLE

## Ipsilateral lower limb motor performance and its association with gait after stroke

Pei-Yun Lee<sup>1</sup>, Chih-Hung Chen<sup>2</sup>, Hui-Yu Tseng<sup>3</sup>, Sang-I Lin<sup>4\*</sup><sup>1</sup> Department of Physical Therapy, Medical College, National Cheng Kung University, Tainan, Taiwan,<sup>2</sup> Department of Neurology, Medical College, National Cheng Kung University, Tainan, Taiwan,<sup>3</sup> Department of Rehabilitation Medicine, Tainan Hospital, Ministry of Health and Welfare, Tainan, Taiwan,<sup>4</sup> Institute of Long-Term Care, MacKay Medical College, New Taipei, Taiwan\* [lin31@mail.ncku.edu.tw](mailto:lin31@mail.ncku.edu.tw)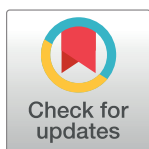

## Abstract

## Background and purpose

Motor deficits of the ipsilateral lower limb could occur after stroke and may be associated with walking performance. This study aimed to determine whether the accuracy and movement path of targeted movement in the ipsilateral lower limb would be impaired in the chronic stage of stroke and whether this impairment would contribute to gait.

## Methods

Twenty adults with chronic stroke and 20 age-matched controls went through Mini Mental Status Examination (MMSE), and a series of sensorimotor tests. The targeted movement tasks were to place the big toe ipsilateral to the lesion at an external visual target (EXT) or a proprioceptive target (PRO, contralateral big toe) with eyes open (EO) or closed (EC) in a seated position. A motion analysis system was used to obtain the data for the calculation of error distance, deviation from a straight path, and peak toe-height during the targeted movement tasks and gait velocity, step length, step width and step length symmetry of the lower limb ipsilateral to the brain lesion during walking.

## Results

The stroke group had significantly lower MMSE and poorer visual acuity on the ipsilateral side, but did not differ in age or other sensorimotor functions when compared to the controls. For the targeted movement performance, only the deviation in PRO-EC showed significant between-group differences ( $p = 0.02$ ). Toe-height in both EXT-EO and in PRO-EO was a significant predictor of step length ( $R^2 = 0.294$ ,  $p = 0.026$ ) and step length symmetry ( $R^2 = 0.359$ ,  $p = 0.014$ ), respectively.

## Discussion and conclusions

The performance of ipsilateral lower limb targeted movement could be impaired after stroke and was associated with step length and its symmetry. The training of ipsilateral targeted movement with unseen proprioceptive target may be considered in stroke rehabilitation.

## OPEN ACCESS

**Citation:** Lee P-Y, Chen C-H, Tseng H-Y, Lin S-I (2024) Ipsilateral lower limb motor performance and its association with gait after stroke. PLOS ONE 19(2): e0297074. <https://doi.org/10.1371/journal.pone.0297074>

**Editor:** Roberto Di Marco, University of Verona: Universita degli Studi di Verona, ITALY

**Received:** March 16, 2023

**Accepted:** December 22, 2023

**Published:** February 2, 2024

**Copyright:** © 2024 Lee et al. This is an open access article distributed under the terms of the [Creative Commons Attribution License](https://creativecommons.org/licenses/by/4.0/), which permits unrestricted use, distribution, and reproduction in any medium, provided the original author and source are credited.

**Data Availability Statement:** All relevant data are within the manuscript.

**Funding:** This study was supported by a research grant from the Ministry of Science and Technology, Taiwan (Grant number: MOST 105-2314-B-006-011-MY3) awarded to SIL. The funders had no role in study design, data collection and analysis, decision to publish, or preparation of the manuscript.

**Competing interests:** The authors have declared that no competing interests exist.

## Introduction

Stroke affects more than 80 million people globally and is the leading cause of disability among adults worldwide [1–3]. More than half of stroke survivors reported still having residual functional limitations in the chronic stage [4–6]. Sensory and motor impairments on the contralateral side of stroke are commonly accepted as the primary underlying cause of functional limitations. While this notion cannot be disputed, the function of the limbs ipsilateral to the lesion should not be overlooked, as it can help to compensate for the lost function and contribute to the maximization of functional ability [7–10].

Anatomical and imaging studies have shown that the descending pathways from the motor cortex, although predominantly cross to the contralateral side, there remain some ipsilateral connections [11]. Stroke may affect the origin of these uncrossed connections and lead to ipsilateral motor deficits. Imaging studies have also shown bilateral cortical activation during unilateral hand movements, suggesting bilateral hemispheric control of movement [12, 13]. Thus, brain lesion on one side could affect motor performance bilaterally. When taken together, these notions suggest the possibility of ipsilateral motor deficits after a stroke.

For the ipsilateral upper limb, motor deficits could be observed soon after stroke [14–16]. In the chronic stage of stroke, ipsilateral upper limb motor deficits continue to exist, including lower muscle strength [17, 18], slower movement time [8, 17, 19–21], larger aiming error [17, 22, 23], and poorer dexterity [18] and force regulation [24], compared to non-impaired age-matched controls. Some of these ipsilateral deficits have been found to be related to the performance of daily activities [18, 25, 26].

For the lower limb motor deficits ipsilateral to the lesion, the information is scarce. Immediately after stroke, the ipsilateral quadriceps showed smaller peak isometric torque and poorer force regulation [27]. The ability of ipsilateral foot tracking was also found to be impaired, i.e. slower and less accurate, in the subacute stage of stroke [28]. In the chronic stage, when performing fast repeated target tapping with the ipsilateral foot, stroke patients were found to require longer time between landing and liftoff [20]. In both previous studies of ipsilateral lower limb movement control, external visual targets were used for the study of tracking movements. However, in daily living, the foot ipsilateral to the lesion may need to make discrete movements or move to a location in relation to the contralateral foot, i.e. proprioceptive target. What is more, it is unclear if ipsilateral motor deficits would be associated with declined walking performance after stroke.

The purposes of this study were to determine whether the accuracy and movement path of targeted movement in the ipsilateral lower limb would be impaired in the chronic stage of stroke and whether this impairment would be related to gait. It was hypothesized that for the stroke group, their performance of ipsilateral targeted movement, including accuracy and movement path, would differ from the controls, and these performances would be associated with gait. Specifically, this study used external and proprioceptive targets to simulate the need of daily activities. The information could improve the understanding of motor deficits after stroke and provide information for the planning of stroke rehabilitation in the chronic stage.

## Methods

### Study participants

Persons with stroke who visited outpatient clinics at the neurology department of a medical center and the rehabilitation department of a local hospital during the experimental period were screened for eligibility and invited to participate. The inclusion criteria included having a unilateral first time **cortical/subcortical** stroke at least 6 months ago, medically stable and able

to understand instructions and follow experimental commands. The exclusion criteria included full or near full recovery of the lower limb motor function (Brunnstrom motor recovery stage VI or better) or other neuromuscular or musculoskeletal conditions that would interfere with the lower limb movements or walking. Forty-seven stroke patients were contacted. Among them, 21 patients were excluded because of not meeting the inclusion criteria or refusing to participate in the study. Another six patients were unable to complete the experimental procedure because of fatigue. A group of age-matched controls (CON) from nearby communities was also recruited. The Institutional Review Board of the National Cheng Kung University Hospital approved this study. All the research methods were performed in accordance with the provisions of the Declaration of Helsinki (as revised in Tokyo 2004). All the participants provided written informed consents. The corresponding author has access to information that could identify individual participants during or after data collection. After enrollment, the participants received sample characterization, targeted movement, and walking tests sequentially.

### Sample characterization

For the characterization of the study participants, a series of sensorimotor function tests were conducted. The modified Traditional Chinese version of the Mini Mental State Examination (MMSE, maximal score = 33) has been found to have high reliability and was used to assess cognitive function [29]. This version added three items, subtraction (7 minus 3), addition (2 plus 4), and writing down one's name, to account for the impact of low education level. Visual acuity was tested with a standard printed Snellen eye chart 6 m away. The Snellen eye chart is widely used for clinical visual acuity assessment due to its ease of use, even though its reliability has been demonstrated to be poor [30]. The Fugl-Meyer lower extremity motor scale (FMLE-motor, range 0–34) has been shown to have high reliability [31] and was used to measure the motor function of the lower limb contralateral to the stroke. **A score of 21 or higher has been shown to indicate a high level of mobility function in persons with chronic stroke [32].** The scale included the test of reflex activity of the knee flexors and extensors, volitional movement within synergies, volitional movement mixing synergies, and volitional movement without synergy, and coordination (heel-to-knee cap in supine). Because the majority of the stroke participants showed involuntary associated movements in the contralateral lower limb, the leg muscle strength was not directly measured. Grip strength, a measure which has been shown to be highly correlated with the strength and motor function of the lower limbs [33, 34], was measured using a handgrip dynamometer. Plantar cutaneous sensitivity was examined at the plantar side of the first metatarsal head using the Semmes-Weinstein monofilaments (Patterson Company, IL, USA). Briefly, the monofilament fiber was applied at a 90° angle to the skin, and the participant indicated if the fiber was felt or not. The smallest filament that the participant was able to perceive indicated the threshold for touch-pressure. The test has been found to have high reliability [35].

A limb matching task, that is moving the ipsilateral limb (less affected side) to match the position of the contralateral limb, is one of the frequently used tests of joint position sense for persons with stroke [3, 36, 37] and was adopted in this study to measure the knee and ankle joint position sense. Participants closed their eyes and sat in a customized, height-adjustable chair with fully supported thighs, and feet freely dangling above the ground. To test the knee joint position sense, the experimenter held the bilateral malleoli to move the nondominant (for CON) or contralateral (for **STROKE**) lower leg approximately 15° into flexion or extension, stopped, and then instructed the participant to match the knee joint angle by moving the other lower leg without moving the rest of the body. To test the ankle joint position sense, the same initial position was adopted except that both heels were supported by a stool. The

experimenter first held the first and fifth metatarsal heads to move the nondominant (for CON) or contralateral (for **STROKE**) ankle joint into plantar- or dorsi-flexion, stopped, then instructed the participant to match the ankle joint angle by moving the other foot without moving the rest of the body. Each task was repeated twice. The differences in the joint angle of the two sides were used to represent joint position sense.

### Targeted movement tests

Participants sat in a customized height-adjustable chair with the trunk erect (no back support), buttocks near the front edge of the seat, knees slightly bent and feet flat on the ground. This starting position was designed to simulate upright standing position in which most of the lower limb functional movement would occur, but with the body weight supported by the chair to minimize the need for balance control. Participants were asked to move the dominant (for CON) or ipsilateral (for **STROKE**) foot to a target on the floor that was covered by black cloths. In daily life, the foot may need to move to a particular location in relation to an external target, such as a slipper, or a proprioceptive target, such as the other foot, either with or without online visual cues. Thus, two types of targets were used, external and proprioceptive, and for each target, the task was performed twice with and without vision. The target would be positioned at a distance approximately one third of the foot-length away from the moving foot's big toe. The participants practiced each condition once before data acquisition. The tests were conducted using either the dominant (for CON) or ipsilateral (for **STROKE**) leg. The test sequence for the proprioceptive and external target conditions was randomized to reduce the potential impact of fatigue or learning.

**External target.** A bright-colored arrowhead (target) was placed on the ground, approximately one third of the foot-length away from the big toe, at a distance easily within reach by the moving foot (dominant side for CON and ipsilateral side for **STROKE**). Participants were allowed 3s to look at the target and memorize its location. Afterwards, the target was removed and the participants were instructed to move the big toe to the memorized target location. In the eyes open condition (EXT-EO), the eyes remained open for the entire test. In the eyes closed condition, participants closed their eyes before moving the foot (EXT-EC).

**Proprioceptive target.** This task required the participant to place the dominant (for CON) or ipsilateral (for **STROKE**) big toe at the location previously occupied by the big toe (target) of the nondominant/contralateral foot. The starting position was identical to that of the external target condition. The target foot was moved passively to a random location within reach of both feet (approximately one-third foot-length in front and within 30° range of its initial location). Participants were allowed 3s to memorize the target location. Afterwards, the feet were first lifted off the floor and then the chair was rotated approximately 30° around the vertical axis toward the side of the target foot after the participants opened their eyes. This condition was designed to simulate a situation where the foot ipsilateral to the lesion was to move to a position in relation to the contralateral foot after the position of the body has been changed in the environment, similar to walking. In the eyes open condition (PRO-EO), the eyes remained open throughout the test. In the eyes closed condition (PRO-EC), participants closed their eyes when the contralateral foot was being passively moved, and then opened the eyes after the chair rotation.

### Walking test

Participants were instructed to walk at their preferred speed on an obstacle-free walkway for 8 meters and used their usual walking devices as needed. The test was performed once.

## Data reduction and statistical analysis

SIMI MOTION® (SIMI Reality Motion Systems GmbH, Unterschleissheim, Germany) with an eight-camera 3 dimensional motion analysis system was used to record the lower limb kinematics with a sampling rate of 100 Hz for joint position sense, targeted movement and walking tests. For the joint position sense assessment and walking test, reflective markers were placed at the midpoint between the two posterior superior iliac spines, and bilateral anterior superior iliac spines, greater trochanters, medial and lateral epicondyles of the knees, medial and lateral malleolus, second metatarsal heads, and heels in order to calculate the knee and ankle joint angle. Two reflective markers were placed at the nails of both big toes to indicate their positions during the targeted movements and an additional marker was used to indicate the location of the arrow for the external target conditions.

Computer algorithms written in MATLAB (Version R2013a, The Math Works Inc. MA, USA) were used for data reduction. For the joint position sense assessment, the hip, knee and ankle joint centres were calculated according to the joint kinematic methods proposed by the International Society of Biomechanics [38]. The hip and knee joint centre formed the thigh segment, the knee and ankle joint centre formed the shank segment, and the heel and second metatarsal head formed the foot segment. The knee joint angle was defined as the angle between the thigh and shank segments. The ankle joint angle was defined as the angle between the shank and foot segments. For the external target and exproprioception tests, the position data of the reflective markers were used to calculate the errors and deviations.

The parameters of interest for the targeted movement included the error, deviation, and peak height of the big toe on the side ipsilateral to the lesion (Fig 1). The distance between the final position of the big toe and the target was used to represent error. The mean distance between the big toe (of each data point) and the line between the starting position and the target was used to represent the deviation. Toe-height was the highest point of the big toe trajectory.

For walking performance, the means of two consecutive strides were used for data analysis. Because the parameters for targeted movement primarily concerned spatial characteristics, the gait parameters of interest thus focused on step length and its symmetry index, and step width. Gait velocity was also investigated to represent overall gait performance. Symmetry index (SI) was calculated based on the equation below.

$$SI = \left| 1 - \frac{\textit{ipsilateral}}{\textit{contralateral}} \right|$$

where ipsilateral = the side ipsilateral to the brain lesion

For the basic information and physical function, independent *t*, Mann-Whitney U, and *chi* square tests were used for between group comparisons for continuous, rank ordinal and categorical variables, respectively. For the targeted movement and gait parameters, because most of them were not normally distributed, the Mann-Whitney U tests were used for between-group comparisons. To assess the potential explanation of variance in the gait performance of the ipsilateral lower limb for the stroke group by the targeted movement performance, a step-wise regression analysis was performed. In this analysis, the gait parameter was treated as the dependent variable, while its corresponding significantly correlated targeted movement parameter was considered as the independent variable. Furthermore, considering that the gait characteristics of the limb ipsilateral to the lesion might be associated with the motor function of the contralateral limb, the FMLE-motor scale would also be included as an independent variable in the regression analysis, if it demonstrated a significant correlation with gait performance. Kendall's tau'b correlation analysis was used to determine the correlations between the

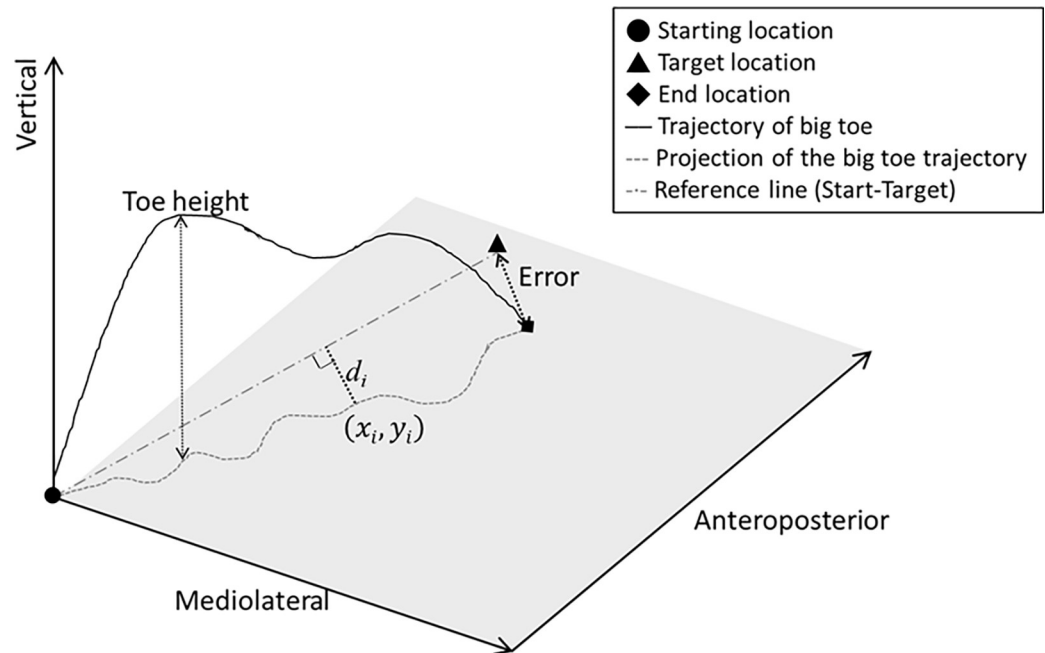

- Error = distance between the end position and target
- Deviation =  $\frac{\sum_i^i d_i}{i}$  ( $d_i$  = the shortest distance between each data point and the reference line)
- Toe height = peak height of the big toe

**Fig 1. Definitions of targeted movement task parameters (error, deviation, toe-height).** The continuous line shows the trajectory of the big toe of the moving leg.

<https://doi.org/10.1371/journal.pone.0297074.g001>

gait parameters, FMLE-motor and targeted movement parameters. The significance level was set at 0.05.

## Results

There were 20 participants in each group. Compared to CON, **STROKE** had significantly lower MMSE and poorer ipsilateral side (comparing to the dominant side of CON) visual acuity. Comparing to the dominant side of CON (Table 1), the ipsilateral side of **stroke** had significantly poorer visual acuity, but not grip strength or plantar sensitivity. Comparing to the non-dominant side of CON (Table 1), the contralateral side of **stroke** had significantly smaller grip strength, but not visual acuity or plantar sensitivity. Regarding the targeted movement performance, it was observed that only the deviation in PRO-EC exhibited significant differences between the two groups. Specifically, **STROKE** displayed a greater deviation in PRO-EC compared to CON. (Table 1). Fig 2 displays examples of targeted movement trajectories under various conditions. The gait parameters were all significantly different between the two groups (Table 1).

Table 2 shows the results of correlation and regression analysis for **STROKE**. Gait velocity and step width were not significantly correlated with any of the targeted movement parameters, and thus regression analysis was not conducted. The ipsilateral step length was significantly correlated with deviation and toe-height in EXT-EO, and FMLE-motor. The variables EXT-EO toe-height and FMLE-motor explained 29.4% and 17% of the variance in ipsilateral



**Table 1. Basic characteristics, targeted movement performance and gait.** Ipsilateral and contralateral side refers to the side Ipsilateral and contralateral to the stroke, respectively.

|                                    | Control   | Stroke    | <i>p</i> |
|------------------------------------|-----------|-----------|----------|
| Age (years)                        | 61.9±8.0  | 61.8±8.3  | 0.85     |
| Mini Mental Status Examination     | 31.9±1.0  | 29.6±3.7  | 0.005*   |
| Stroke                             |           |           |          |
| Side (right/left)                  |           | 10/10     |          |
| Duration (month)                   |           | 33.8±30.4 |          |
| Fugl-Meyer lower limb motor scale  |           | 19.4±5.1  |          |
| ≥21/<21 <sup>#</sup>               |           | 11/9      |          |
| Dominant/ipsilateral side          |           |           |          |
| Visual acuity (decimal)            | 0.70±0.33 | 0.47±0.24 | 0.019*   |
| Plantar sensitivity big toe (dB)   | 4.00±0.17 | 4.08±0.59 | 0.221    |
| Grip (% body weight)               | 38±12     | 37±10     | 0.642    |
| Non-dominant/contralateral side    |           |           |          |
| Visual acuity (decimal)            | 0.63±0.31 | 0.58±0.27 | 0.708    |
| Plantar sensitivity big toe (dB)   | 4.01±0.19 | 4.21±0.46 | 0.076    |
| Grip (% body weight)               | 35±10     | 16±17     | 0.002*   |
| Joint position error (degree)      |           |           |          |
| Knee                               | 4.90±4.24 | 5.28±2.64 | 0.737    |
| Ankle                              | 6.49±2.75 | 7.32±5.03 | 0.534    |
| Targeted movement performance      |           |           |          |
| External target                    |           |           |          |
| Error (cm)                         |           |           |          |
| Eyes closed                        | 3.05±1.14 | 3.29±1.21 | 0.512    |
| Eyes open                          | 2.05±0.60 | 2.02±0.51 | 0.904    |
| Deviation (cm/data point x 100)    |           |           |          |
| Eyes open                          | 0.72±0.28 | 0.65±0.21 | 0.718    |
| Eyes closed                        | 1.15±0.45 | 1.43±0.74 | 0.301    |
| Toe-height (cm)                    |           |           |          |
| Eyes open                          | 4.62±1.82 | 5.53±1.92 | 0.105    |
| Eyes closed                        | 4.40±1.55 | 5.24±2.13 | 0.174    |
| Proprioceptive target              |           |           |          |
| Error (cm)                         |           |           |          |
| Eyes open                          | 2.59±1.65 | 3.20±2.46 | 0.383    |
| Eyes closed                        | 4.86±2.31 | 7.21±4.40 | 0.091    |
| Deviation (cm/data point x 100)    |           |           |          |
| Eyes open                          | 2.08±1.26 | 2.35±1.42 | 0.565    |
| Eyes closed                        | 2.37±0.72 | 3.74±2.05 | 0.02*    |
| Toe-height (cm)                    |           |           |          |
| Eyes open                          | 6.72±2.87 | 7.55±2.87 | 0.231    |
| Eyes closed                        | 6.90±2.28 | 7.57±2.60 | 0.398    |
| Gait parameters (ipsilateral side) |           |           |          |
| Gait velocity (m/s)                | 1.17±0.18 | 0.49±0.35 | <0.001*  |
| Step length (m)                    | 0.61±0.09 | 0.33±0.19 | <0.001*  |
| Step width (m)                     | 0.10±0.03 | 0.14±0.04 | 0.001*   |
| Symmetry index of step length      | 0.15±0.09 | 2.07±5.20 | 0.039*   |

\*statistically significant

<sup>#</sup> A Fugl-Meyer lower limb motor scale ≥21 indicated a high level of mobility function.<https://doi.org/10.1371/journal.pone.0297074.t001>

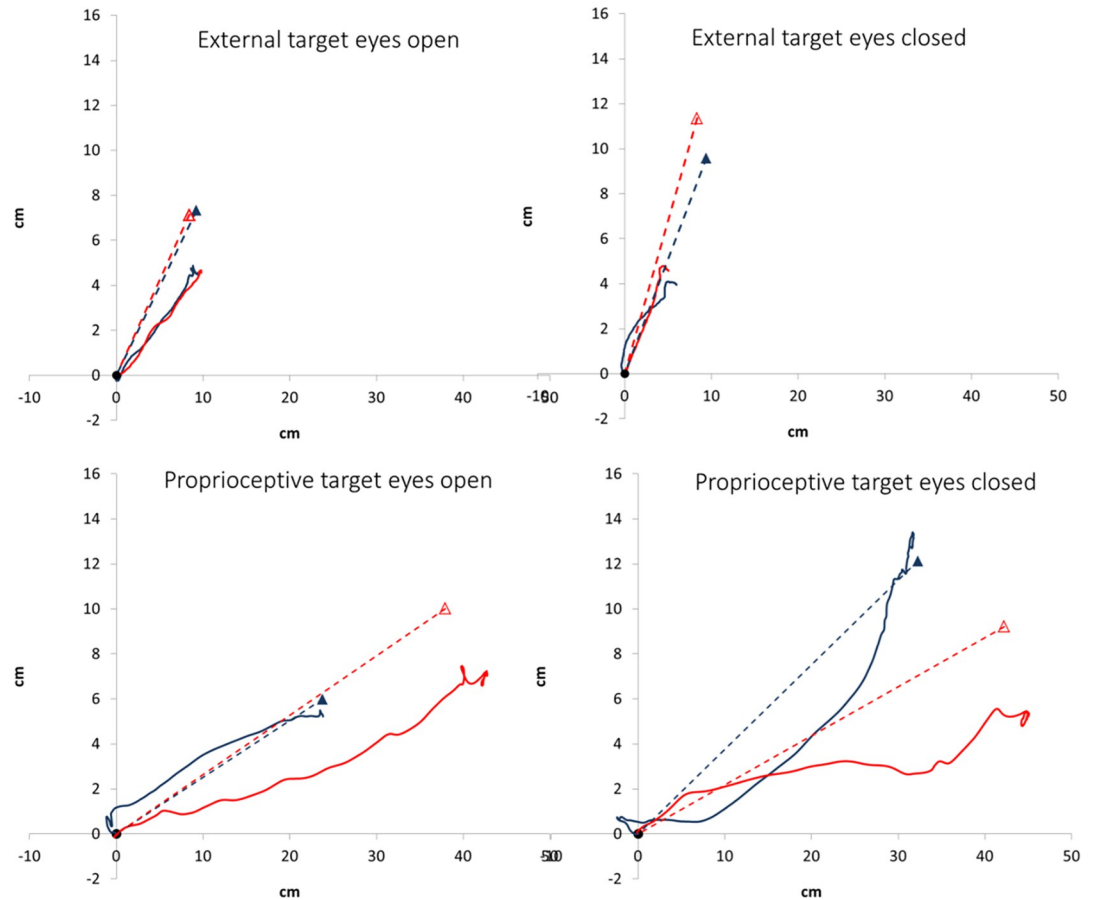

**Fig 2. The big toe trajectory of the ipsilateral leg targeted movement tasks of a representative control (blue lines) and stroke (red lines) participant.** Circle: starting position; triangle: target location; continuous line: trajectory of the big toe; dotted line: direct line between the starting position and target in the sagittal plane.

<https://doi.org/10.1371/journal.pone.0297074.g002>

**Table 2. Results of correlation and regression analysis.**

| Dependent factor              | Independent factors (correlation coefficient) <sup>#</sup> | R <sup>2</sup> change | Beta coefficient | 95% CI        | p      |
|-------------------------------|------------------------------------------------------------|-----------------------|------------------|---------------|--------|
| Gait velocity                 | None                                                       |                       |                  |               |        |
| Step length                   | EXT-EO deviation (-0.490)                                  | NI                    |                  |               |        |
|                               | EXT-EO toe-height (-0.412)                                 | 0.294                 | -0.474           | -2.751~-0.206 | 0.026* |
|                               | FMLE-motor (0.485)                                         | 0.170                 | 0.418            | 0.033~2.920   | 0.046* |
| Step width                    | None                                                       |                       |                  |               |        |
| Symmetry index of step length | EXT-EO toe-height (0.386)                                  | NI                    |                  |               |        |
|                               | PRO-EO toe-height (0.359)                                  | 0.323                 | 0.569            | 0.565~4.284   | 0.014* |
|                               | FMLE-motor (0.364)                                         | NI                    |                  |               |        |

<sup>#</sup> factors significantly correlated with the dependent factor in correlation analysis

CI: confidence interval

NI: not included in the regression model

FMLE-motor: Fugl-Meyer lower limb motor scale

<https://doi.org/10.1371/journal.pone.0297074.t002>



step length, respectively. The symmetry index of step length was significantly correlated with toe-height in EXT-EO and PRO-EO, and FMLE-motor, with PRO-EO toe-height explaining 32.3% of the variance.

## Discussions

After stroke, the function of the ipsilateral limbs could be important. This study focused on the ipsilateral lower limb targeted movement of stroke participants and found that, compared to the controls, the movement path was less straight when the target was the un-seen contralateral foot. Furthermore, some of the ipsilateral targeted movement parameters could explain more than a quarter of the variance in step length and its symmetry during walking for the stroke group. These findings suggest that ipsilateral lower limb function could be impaired after stroke and could affect walking performance.

To move a body end point (such as hand or foot) to an intended location in the environment, several functions are needed, including sensory information about the target with respect to the body and about the initial position of the body, transformation of this information into motor commands, and sending out motor commands for movement execution [39–41]. In this study, the between-group difference in the targeted movement were not significant when the target was clearly seen, i.e. in EXT-EO and EC and PRO-EO. Therefore it seemed that for the ipsilateral lower limb in persons with stroke, these functions were not likely to be impaired to an extent that would affect the accuracy or movement path of targeted movement performance.

To reach a target without any temporal or spatial constraints, the most efficient movement path would be a straight line from the starting point to the target, and the hand tends to move fairly straight when the target location is known [42]. Studies have shown that when there is uncertainty about the target, greater deviations in the hand path would occur in monkeys, while humans would tend to exhibit greater path length in reaching movements [43–45]. Insufficient sensory inputs or errors in sensory estimates of the target could result in target uncertainty and possibly lead to deviations in movement path [43, 46]. In the proprioceptive target conditions in this study, the location of a body segment in the environment was the target. The perception of the orientation of the body in extra-personal space relies on visual, proprioceptive and exteroceptive inputs, however these signals alone are insufficient to provide this information [47–53]. It has been proposed that these signals when mapped onto a body representation could provide information about the body in extra-personal space [47, 52–54]. The awareness of the limb orientation in the environment can also enable the planning of motor commands to move the limb directly toward a target outside the body [55].

In PRO-EC, there were no visual cues for the estimation of the target location and it was found that the movement path of the stroke group had significantly greater deviation, compared to the controls. Moreover, the absence of a significant between-group difference in PRO-EO also suggested that the between-group differences observed in PRO-EC could mainly be attributed to the differences in visual cues. It appeared that the stroke group was affected to a greater extent by a lack of visual cues about the target. These findings also implied that the ability to estimate the location of the contralateral foot in the environment without visual cues might be affected after stroke.

**Previous studies have reported that possibly due to deficits in motor control mechanisms, such as movement planning and organization, stroke may lead to declines in the performance of ipsilateral upper limb aiming movement [8, 20, 56]. For the lower limb, in addition to sensorimotor function of the contralateral lower limb, muscle strength in the ipsilateral lower limb have also been shown to exhibit associations with gait patterns after**

unilateral stroke previously [57–60]. This study included persons with chronic stroke with different mobility function levels and was the first to report that ipsilateral lower limb targeted movement performance was also associated with gait after stroke. **The sub-tasks involved in gait adaptation primarily include taking a step to properly place the foot in the environment and at the same time maintaining forward propulsion force and balance in healthy adults and persons with stroke [61, 62]. Targeted movement is a fundamental ability in proper foot placement and could thus be associated with gait.** Specifically, in the external and proprioceptive target eyes open conditions, greater toe-height predicted shorter step length and poorer step length symmetry. For the stroke group, while the motor function (FMLE-motor) of the contralateral lower limb was found to be a significant factor influencing step length, its impact was relatively minor compared to the performance of targeted movement in the proprioceptive target eyes closed condition (PRO-EC).

It should also be noted that in this study, the big toe and the target were placed on the ground and therefore lifting the foot off the floor was not necessary. In spite of this, all the participants lifted the foot off the floor while moving toward the target. Intuitively, this behavioral strategy was used to avoid foot-ground contact. During the swing phase of walking, the swing foot also needs to avoid floor contact. While walking under more challenging conditions, such as vision restrictions or floor irregularity, attention would be consciously diverted toward the control of the lower limbs. This could lead to increased minimal distance between the swing foot and the floor [63–65]. In the eyes open condition in this study, continuous online visual cues about the distance between the foot and the floor were available and could be consciously used for the control of the movement. Therefore, lifting the foot higher off the floor, resulting in greater toe-height, could serve as an indicator of heightened attentiveness to the control of the swing foot. For stroke participants, this shift in attention could possibly mean taking smaller steps or allocating less attention to maintaining gait symmetry in order to minimize foot-floor contact. Further studies are needed to verify these notions.

This study is limited in several ways. The psychometric properties of the targeted movement performance measurements were not tested and could limit the reliability of the data. The mechanisms underlying the association between targeted movement performance and gait were not investigated. The contributions of the sensorimotor function of the lower limbs contralateral to the stroke were not included in the regression analysis due to sample size limitations. Future studies are needed to better understand these issues.

In conclusion, persons with stroke did not differ from healthy controls in performing ipsilateral lower limb targeted movement when the target location was visible prior to initiating the movement. When the target was the contralateral foot and not visible, the motion of the ipsilateral leg showed significantly greater deviation, suggesting impaired ability to estimate the location of the contralateral foot within the environment without visual cues after stroke. The performance of ipsilateral targeted movement within the stroke group accounted for over a quarter of the variation in both step length and its symmetry. These findings together **implied that the training of ipsilateral targeted movement may be helpful in improving walking performance for people with chronic stroke. However, future studies are needed to examine the possible effects.**

## Acknowledgments

The authors thank Nai-Hua Kuo, Yu-Chuan Chang and Pei-Yun M. Lee for help in data collection.

## Author Contributions

**Conceptualization:** Pei-Yun Lee, Chih-Hung Chen, Sang-I Lin.

**Data curation:** Pei-Yun Lee, Chih-Hung Chen.

**Formal analysis:** Pei-Yun Lee, Chih-Hung Chen, Hui-Yu Tseng, Sang-I Lin.

**Funding acquisition:** Sang-I Lin.

**Investigation:** Pei-Yun Lee, Hui-Yu Tseng, Sang-I Lin.

**Methodology:** Pei-Yun Lee, Hui-Yu Tseng, Sang-I Lin.

**Project administration:** Sang-I Lin.

**Resources:** Hui-Yu Tseng, Sang-I Lin.

**Writing – original draft:** Pei-Yun Lee, Chih-Hung Chen, Sang-I Lin.

## References

1. Lindsay MP, Norrving B, Sacco RL, Brainin M, Hacke W, Martins S, et al. World Stroke Organization (WSO): Global Stroke Fact Sheet 2019. *Int J Stroke* 2019; 14:806–817. <https://doi.org/10.1177/1747493019881353> PMID: 31658892
2. Kim J, Thayabaranathan T, Donnan GA, Howard G, Howard VJ, Rothwell PM, et al. Global Stroke Statistics 2019. *Int J Stroke*. 2020; 15:819–838. <https://doi.org/10.1177/1747493020909545> PMID: 32146867
3. Dukelow SP, Herter TM, Bagg SD, Scott SH. The independence of deficits in position sense and visually guided reaching following stroke. *J Neuroeng Rehabil*. 2012; 9:72. <https://doi.org/10.1186/1743-0003-9-72> PMID: 23035968
4. Wesselhoff S, Hanke TA, Evans CC. Community mobility after stroke: a systematic review. *Top Stroke Rehabil*. 2018; 25:224–238. <https://doi.org/10.1080/10749357.2017.1419617> PMID: 29322861
5. Ullberg T, Zia E, Petersson J, Norrving B. Changes in Functional Outcome Over the First Year After Stroke. *Stroke*. 2015; 46:389–394. <https://doi.org/10.1161/STROKEAHA.114.006538> PMID: 25538204
6. Dhamoon MS, Moon YP, Paik MC, Boden-Albala B, Rundek T, Sacco RL, et al. Long-Term Functional Recovery After First Ischemic Stroke. *Stroke*. 2009; 40:2805–2811. <https://doi.org/10.1161/STROKEAHA.109.549576> PMID: 19556535
7. Kloter E, Wirz M, Dietz V. Locomotion in stroke subjects: interactions between unaffected and affected sides. *Brain*. 2011; 134:721–731. <https://doi.org/10.1093/brain/awq370> PMID: 21303854
8. Ketcham CJ, Rodriguez TM, Zihlman KA. Targeted aiming movements are compromised in nonaffected limb of persons with stroke. *Neurorehabil Neural Repair*. 2007; 21:388–397. <https://doi.org/10.1177/1545968306297872> PMID: 17369510
9. Raja B, Neptune RR, Kautz SA. Coordination of the non-paretic leg during hemiparetic gait: Expected and novel compensatory patterns. *Clin Biomech (Bristol, Avon)*. 2012. <https://doi.org/10.1016/j.clinbiomech.2012.08.005> PMID: 22981679
10. Balbinot G, Schuch CP, BO H, Peyré-Tartaruga LA. Mechanical and energetic determinants of impaired gait following stroke: segmental work and pendular energy transduction during treadmill walking. *Biol Open*. 2020; 9:bio051581. <https://doi.org/10.1242/bio.051581> PMID: 32694152
11. Alawieh A, Tomlinson S, Adkins D, Kautz S, Feng W. Preclinical and Clinical Evidence on Ipsilateral Corticospinal Projections: Implication for Motor Recovery. *Transl Stroke Res* 2017; 8:529–540. <https://doi.org/10.1007/s12975-017-0551-5> PMID: 28691140
12. Hummel F, Kirsammer R, Gerloff C. Ipsilateral cortical activation during finger sequences of increasing complexity: representation of movement difficulty or memory load? *Clin Neurophysiol*. 2003; 114:605–613. [https://doi.org/10.1016/s1388-2457\(02\)00417-0](https://doi.org/10.1016/s1388-2457(02)00417-0) PMID: 12686269
13. Johansen-Berg H, Rushworth MFS, Bogdanovic MD, Kischka U, Wimalaratna S, Matthews PM. The role of ipsilateral premotor cortex in hand movement after stroke. *Proc Natl Acad Sci U S A* 2002; 99:14518–14523. <https://doi.org/10.1073/pnas.222536799> PMID: 12376621
14. Noskin O, Krakauer JW, Lazar RM, Festa JR, Handy C, O'Brien KA, et al. Ipsilateral motor dysfunction from unilateral stroke: implications for the functional neuroanatomy of hemiparesis. *J Neurol Neurosurg Psychiatry*. 2008; 79:401–406. <https://doi.org/10.1136/jnnp.2007.118463> PMID: 17635970
15. Sarlegna FR, Przybyla A, Sainburg RL. The influence of target sensory modality on motor planning may reflect errors in sensori-motor transformations. *Neuroscience*. 2009; 164:597–610. <https://doi.org/10.1016/j.neuroscience.2009.07.057> PMID: 19647787

16. Laufer Y, Gattenio L, Parnas E, Sinai D, Sorek Y, Dickstein R. Time-related Changes in Motor Performance of the Upper Extremity Ipsilateral to the Side of the Lesion in Stroke Survivors. *Neurorehabil Neural Repair*. 2001; 15:167–172. <https://doi.org/10.1177/154596830101500303> PMID: 11944737
17. Yarosh CA, Hoffman DS, Strick PL. Deficits in Movements of the Wrist Ipsilateral to a Stroke in Hemiparetic Subjects. *J Neurophysiol*. 2004; 92:3276–3285. <https://doi.org/10.1152/jn.00549.2004> PMID: 15295013
18. Wetter S, Poole JL, Haaland KY. Functional implications of ipsilesional motor deficits after unilateral stroke. *Arch Phys Med Rehabil*. 2005; 86:776–781. <https://doi.org/10.1016/j.apmr.2004.08.009> PMID: 15827931
19. Winstein CJ, Pohl PS. Effects of unilateral brain damage on the control of goal-directed hand movements. *Exp Brain Res*. 1995; 105:163–174. <https://doi.org/10.1007/BF00242191> PMID: 7589312
20. Kim SH, Pohl PS, Luchies CW, Stylianou AP, Won Y. Ipsilateral deficits of targeted movements after stroke. *Arch Phys Med Rehabil*. 2003; 84:719–724. [https://doi.org/10.1016/s0003-9993\(02\)04973-0](https://doi.org/10.1016/s0003-9993(02)04973-0) PMID: 12736888
21. Pohl PS, Luchies CW, Stoker-Yates J, Duncan PW. Upper extremity control in adults post stroke with mild residual impairment. *Neurorehabil Neural Repair*. 2000; 14:33–41. <https://doi.org/10.1177/154596830001400104> PMID: 11228947
22. Schaefer SY, Haaland KY, Sainburg RL. Ipsilesional motor deficits following stroke reflect hemispheric specializations for movement control. *Brain*. 2007; 130:2146–2158. <https://doi.org/10.1093/brain/awm145> PMID: 17626039
23. Jones RD, Donaldson IM, Parkin PJ. Impairment and recovery of ipsilateral sensory-motor function following unilateral cerebral infarction. *Brain*. 1989; 112:113–132. <https://doi.org/10.1093/brain/112.1.113> PMID: 2917274
24. Quaney BM, Perera S, Maletsky R, Luchies CW, Nudo RJ. Impaired Grip Force Modulation in the Ipsilesional Hand after Unilateral Middle Cerebral Artery Stroke. *Neurorehabilitation and Neural Repair*. 2005; 19:338–349. <https://doi.org/10.1177/1545968305282269> PMID: 16263966
25. Desrosiers J, Bourbonnais D, Bravo G, Roy PM, Guay M. Performance of the 'unaffected' upper extremity of elderly stroke patients. *Stroke*. 1996; 27:1564–1570. <https://doi.org/10.1161/01.str.27.9.1564> PMID: 8784131
26. Sunderland A. Recovery of ipsilateral dexterity after stroke. *Stroke*. 2000; 31:430–433. <https://doi.org/10.1161/01.str.31.2.430> PMID: 10657418
27. Chow JW, Stokic DS. Force control of quadriceps muscle is bilaterally impaired in subacute stroke. *J Appl Physiol (1985)*. 2011; 111:1290–1295. <https://doi.org/10.1152/jappphysiol.00462.2011> PMID: 21885803
28. Kawahira K, Shimodozono M, Ogata A, Etoh S, Ikeda S, Yoshida A, et al. Impaired Visuo-Motor Skills in the Unaffected Lower Limb of Patients with Stroke. *Int J Neurosci*. 2005; 115:1315–1332. <https://doi.org/10.1080/00207450590934561> PMID: 16048808
29. Guo NW, Liu HC, Wong PF, Liao KK, Yan SH, Lin KP, et al. Chinese version and norms of the Mini-Mental State Examination. *J Rehabil Med Assoc Taiwan*. 1988; 16:52–59.
30. Currie Z, Bhan A, Pepper I. Reliability of Snellen charts for testing visual acuity for driving: prospective study and postal questionnaire. *BMJ*. 2000; 321:990–992. <https://doi.org/10.1136/bmj.321.7267.990> PMID: 11039964
31. Duncan PW, Propst M, Nelson SG. Reliability of the Fugl-Meyer assessment of sensorimotor recovery following cerebrovascular accident. *Phys Ther*. 1983; 63:1606–1610. <https://doi.org/10.1093/ptj/63.10.1606> PMID: 6622535
32. Kwong PWH, Ng SSM. Cutoff Score of the Lower-Extremity Motor Subscale of Fugl-Meyer Assessment in Chronic Stroke Survivors: A Cross-Sectional Study. *Arch Phys Med Rehabil*. 2019; 100:1782–1787. <https://doi.org/10.1016/j.apmr.2019.01.027> PMID: 30902629
33. Strandkvist V, Larsson A, Pauelsen M, Nyberg L, Vikman I, Lindberg A, et al. Hand grip strength is strongly associated with lower limb strength but only weakly with postural control in community-dwelling older adults. *Arch Gerontol Geriatr*. 2021; 94:104345. <https://doi.org/10.1016/j.archger.2021.104345> PMID: 33497911
34. Bohannon RW, Magasi SR, Bubela DJ, Wang YC, Gershon RC. Grip and knee extension muscle strength reflect a common construct among adults. *Muscle Nerve*. 2012; 46:555–558. <https://doi.org/10.1002/mus.23350> PMID: 22987697
35. Birke JA, Brandsma JW, Schreuders TA, Piefer A. Sensory testing with monofilaments in Hansen's disease and normal control subjects. *Int J Lepr Other Mycobact Dis*. 2000; 68:291–298. PMID: 11221092

36. Gurari N, Drogos JM, Dewald JP. Individuals with chronic hemiparetic stroke can correctly match forearm positions within a single arm. *Clin Neurophysiol*. 2017; 128:18–30. <https://doi.org/10.1016/j.clinph.2016.10.009> PMID: 27866116
37. Yalcin E, Akyuz M, Onder B, Kurtaran A, Buyukvural S, Ozbudak Demir S. Position sense of the hemiparetic and non-hemiparetic ankle after stroke: is the non-hemiparetic ankle also affected? *Eur Neurol*. 2012; 68:294–299. <https://doi.org/10.1159/000342025> PMID: 23051834
38. Wu G, Siegler S, Allard P, Kirtley C, Leardini A, Rosenbaum D, et al. ISB recommendation on definitions of joint coordinate system of various joints for the reporting of human joint motion—part I: ankle, hip, and spine. International Society of Biomechanics. *J Biomech*. 2002; 35:543–548. [https://doi.org/10.1016/s0021-9290\(01\)00222-6](https://doi.org/10.1016/s0021-9290(01)00222-6) PMID: 11934426
39. d'Avella A. Modularity for motor control and motor learning. *Adv Exp Med Biol*. 2016; 957:3–19. [https://doi.org/10.1007/978-3-319-47313-0\\_1](https://doi.org/10.1007/978-3-319-47313-0_1) PMID: 28035557
40. Sarlegna FR, Sainburg RL. The effect of target modality on visual and proprioceptive contributions to the control of movement distance. *Exp Brain Res*. 2007; 176:267–280. <https://doi.org/10.1007/s00221-006-0613-5> PMID: 16896981
41. Prodoehl J, Gottlieb GL, Corcos DM. The neural control of single degree-of-freedom elbow movements. Effect of starting joint position. *Exp Brain Res*. 2003; 153:7–15. <https://doi.org/10.1007/s00221-003-1564-8> PMID: 14566444
42. Morasso P. Spatial control of arm movements. *Exp Brain Res*. 1981; 42:223–227. <https://doi.org/10.1007/BF00236911> PMID: 7262217
43. Georgopoulos AP, Kalaska JF, Massey JT. Spatial trajectories and reaction times of aimed movements: effects of practice, uncertainty, and change in target location. *J Neurophysiol*. 1981; 46:725–743. <https://doi.org/10.1152/jn.1981.46.4.725> PMID: 7288461
44. Krüger M, Hermsdörfer J. Target uncertainty during motor decision-making: the time course of movement variability reveals the effect of different sources of uncertainty on the control of reaching movements. *Front Psychol*. 2019; 10:1–13. <https://doi.org/10.3389/fpsyg.2019.00041> PMID: 30745887
45. van Beers RJ, Baraduc P, Wolpert DM. Role of uncertainty in sensorimotor control. *Philos Trans R Soc Lond B Biol Sci*. 2002; 357:1137–1145. <https://doi.org/10.1098/rstb.2002.1101> PMID: 12217180
46. Osborne LC, Lisberger SG, Bialek W. A sensory source for motor variation. *Nature*. 2005; 437:412–416. <https://doi.org/10.1038/nature03961> PMID: 16163357
47. Sarlegna FR, Sainburg RL. The roles of vision and proprioception in the planning of reaching movements. *Adv Exp Med Biol*. 2009; 629:317–335. [https://doi.org/10.1007/978-0-387-77064-2\\_16](https://doi.org/10.1007/978-0-387-77064-2_16) PMID: 19227507
48. Aman JE, Elangovan N, Yeh IL, Konczak J. The effectiveness of proprioceptive training for improving motor function: a systematic review. *Front Hum Neurosci*. 2014; 8:1075. <https://doi.org/10.3389/fnhum.2014.01075> PMID: 25674059
49. Bernier PM, Gauthier GM, Blouin J. Evidence for distinct, differentially adaptable sensorimotor transformations for reaches to visual and proprioceptive targets. *J Neurophysiol*. 2007; 98:1815–1819. <https://doi.org/10.1152/jn.00570.2007> PMID: 17634334
50. Lamontagne A, Paquette C, Fung J. Stroke affects the coordination of gaze and posture during pre-planned turns while walking. *Neurorehabil Neural Repair*. 2007; 21:62–67. <https://doi.org/10.1177/1545968306290822> PMID: 17172555
51. Mon-Williams M, Tresilian JR, Wann JP. Perceiving limb position in normal and abnormal control: An equilibrium point perspective. *Human Movement Science*. 1999; 18:397–419.
52. Tsay AJ, Giummarra MJ, Allen TJ, Proske U. The sensory origins of human position sense. *J Physiol*. 2016; 594:1037–1049. <https://doi.org/10.1113/JP271498> PMID: 26537335
53. Izumizaki M, Tsuge M, Akai L, Proske U, Homma I. The illusion of changed position and movement from vibrating one arm is altered by vision or movement of the other arm. *J Physiol*. 2010; 588:2789–2800. <https://doi.org/10.1113/jphysiol.2010.192336> PMID: 20547672
54. Limanowski J, Blankenburg F. Integration of visual and proprioceptive limb position information in human posterior parietal, premotor, and extrastriate cortex. *J Neurosci*. 2016; 36:2582–2589. <https://doi.org/10.1523/JNEUROSCI.3987-15.2016> PMID: 26937000
55. Lee DN, Pick HLJ, Saltzman E. *Modes of perceiving and processing information*. 1 ed. Psychology Press; 1978.
56. Velicki MR, Winstein CJ, Pohl PS. Impaired direction and extent specification of aimed arm movements in humans with stroke-related brain damage. *Exp Brain Res*. 2000; 130:362–374. <https://doi.org/10.1007/s002219900262> PMID: 10706435

57. Lauzière S, Betschart M, Aissaoui R, Nadeau S. Understanding Spatial and Temporal Gait Asymmetries in Individuals Post Stroke. *Int J Phys Med Rehabil*. 2014; 02:no. 201. <https://doi.org/10.4172/2329-9096.1000201>
58. Cho KH, Lee JY, Lee KJ, Kang EK. Factors Related to Gait Function in Post-stroke Patients. *J Phys Ther Sci*. 2014; 26:1941–1944. <https://doi.org/10.1589/jpts.26.1941> PMID: 25540503
59. Watanabe M, Suzuki M, Sugimura Y, Kawaguchi T, Watanabe A, Shibata K, et al. The relationship between bilateral knee muscle strength and gait performance after stroke: the predictive value for gait performance. *J Phys Ther Sci*. 2015; 27:3227–3232. <https://doi.org/10.1589/jpts.27.3227> PMID: 26644680
60. Flansbjerg UB, Downham D, Lexell J. Knee muscle strength, gait performance, and perceived participation after stroke. *Arch Phys Med Rehabil*. 2006; 87:974–980. <https://doi.org/10.1016/j.apmr.2006.03.008> PMID: 16813786
61. Hollands KL, Pelton TA, van der Veen S, Alharbi S, Hollands MA. A novel and simple test of gait adaptability predicts gold standard measures of functional mobility in stroke survivors. *Gait Posture*. 2016; 43:170–175. <https://doi.org/10.1016/j.gaitpost.2015.09.018> PMID: 26455475
62. van der Veen SM, Hammerbeck U, Hollands KL. Foot-placement accuracy during planned and reactive target stepping during walking in stroke survivors and healthy adults. *Gait Posture*. 2020; 81:261–267. <https://doi.org/10.1016/j.gaitpost.2020.08.114> PMID: 32846357
63. Graci V, Elliott DB, Buckley JG. Peripheral visual cues affect minimum-foot-clearance during over-ground locomotion. *Gait Posture*. 2009; 30:370–374. <https://doi.org/10.1016/j.gaitpost.2009.06.011> PMID: 19628392
64. Killeen T, Easthope CS, Demko L, Filli L, Lorincz L, Linnebank M, et al. Minimum toe clearance: probing the neural control of locomotion. *Sci Rep*. 2017; 7:1922. <https://doi.org/10.1038/s41598-017-02189-y> PMID: 28507300
65. Schulz BW. Minimum toe clearance adaptations to floor surface irregularity and gait speed. *J Biomech*. 2011; 44:1277–1284. <https://doi.org/10.1016/j.jbiomech.2011.02.010> PMID: 21354576
